# Supplementary material for: Sex Differences in Patent Ductus Arteriosus Incidence and Response to Pharmacological Treatment in Preterm Infants: A Systematic Review, Meta-Analysis and Meta-Regression
Source: MDPI journal article supplement (doi:10.3390/jpm12071143), 2022-07-14
Supplement: s1 [file s1]

## Supplementary Material

### Sex differences in patent ductus arteriosus incidence and response to pharmacological treatment in preterm infants: A systematic review, meta-analysis and meta-regression

**Table S1. Search strategy**

|                                                                                                                                                                                                                                                                                                                                                                                                                                                                                                                                                                               |
|-------------------------------------------------------------------------------------------------------------------------------------------------------------------------------------------------------------------------------------------------------------------------------------------------------------------------------------------------------------------------------------------------------------------------------------------------------------------------------------------------------------------------------------------------------------------------------|
| <b>Pubmed</b><br>(<br>(Sex[MESH] OR Sex Characteristics[MESH] OR Sex Distribution[MESH] OR "Sex Characteristic*" [tiab]<br>OR "Gender Difference*" [tiab] OR "Sex Dimorphism*" [tiab] OR "Gender Characteristic*" [tiab] OR<br>"Sex Difference*" [tiab] OR "Sex Distribution*" [tiab] OR "Gender Distribution*" [tiab] OR "Male<br>Disadvantage" [tiab] OR "Female Advantage" [tiab] OR risk [tiab])<br>AND<br>(Patent ductus arteriosus[MESH] OR "Patency of the Ductus Arteriosus" [tiab] OR "Ductus<br>Arteriosus" [tiab] OR "Ductus Botalli" [tiab] OR "PDA" [tiab])<br>) |
| <b>Embase</b><br>(<br>(exp Sex Characteristics/ OR exp Sex Distribution / OR exp Sex Factors/)<br>OR ("male disadvantage" or "female advantage" or gender or sex or "gender difference" or "gender<br>differences" or "sex difference" or "sex differences" or "gender differential" or "gender differentials"<br>or "sex differential" or "sex differentials" or "sexual dimorphism" or "sexually dimorphic")<br>)<br>AND<br>(patent ductus arteriosus)<br>)                                                                                                                 |

**Table S2. Characteristics of the included studies**

| First author, year      | Country               | Prospective? | Total infants | Centers | Mean/median GA cohort | Mean/median BW cohort | Independent variable | Outcomes          | PDA primary outcome | Selection | Comparability | Outcome/Exposure | Total NOS |
|-------------------------|-----------------------|--------------|---------------|---------|-----------------------|-----------------------|----------------------|-------------------|---------------------|-----------|---------------|------------------|-----------|
| Adrouche-Amrani2012 (1) | USA                   | No           | 79            | 1       | 25.8                  | 770.7                 | PDA                  | hsPDA / Treatment | YES                 | 3         | 1             | 3                | 7         |
| Ahamed 2015 (2)         | USA                   | No           | 203           | 1       | 26.5                  | 840.6                 | PDA                  | hsPDA / Treatment | NO                  | 3         | 1             | 3                | 7         |
| Ahmed 2020 (3)          | Egypt                 | Yes          | 75            | 1       | 31.7                  | ND                    | PDA                  | Any PDA           | YES                 | 2         | 1             | 3                | 6         |
| Aikio 2014 (4)          | Finland               | No           | 88            | 1       | 28.6                  | 1308.0                | PDA                  | hsPDA             | YES                 | 3         | 1             | 3                | 7         |
| Akar 2019 (5)           | Turkey                | No           | 389           | 1       | 29.5                  | 1054.8                | PDA                  | hsPDA             | YES                 | 3         | 2             | 2                | 7         |
| Alan 2013 (6)           | Turkey                | Yes          | 25            | 1       | 27.8                  | 988.1                 | PDA                  | hsPDA             | YES                 | 3         | 1             | 3                | 7         |
| Antonucci 2009 (7)      | Italy                 | Yes          | 40            | 1       | 29.5                  | 1305.0                | PDA                  | hsPDA             | NO                  | 2         | 2             | 3                | 7         |
| Asrani 2018 (8)         | USA                   | Yes          | 70            | 1       | 27.9                  | 1014.3                | PDA                  | hsPDA             | YES                 | 3         | 2             | 3                | 8         |
| Bas 2014 (9)            | Spain                 | No           | 194           | 2       | 27.9                  | 1008.5                | PDA                  | hsPDA / Treatment | YES                 | 3         | 1             | 3                | 7         |
| Becerra 2013 (10)       | Mexico                | Yes          | 66            | 1       | 28.0                  | 950.0                 | PDA                  | hsPDA             | YES                 | 3         | 1             | 3                | 7         |
| Bekmez 2018 (11)        | Turkey                | No           | 212           | 1       | 29.0                  | 1237.8                | PDA                  | hsPDA             | YES                 | 3         | 2             | 3                | 8         |
| Bertino 2009 (12)       | Italy                 | Yes          | 262           | 1       | 30.4                  | 1140.0                | Sex                  | hsPDA             | NO                  | 3         | 2             | 2                | 7         |
| Boghossian 2018 (13)    | USA                   | No           | 194112        | 852     | 26.0                  | 919                   | Sex                  | hsPDA             | NO                  | 4         | 2             | 3                | 9         |
| Bonamy 2017 (14)        | 11 European countries | No           | 6896          | Multi   | 29.1                  | 1223.0                | PDA                  | hsPDA             | NO                  | 4         | 1             | 3                | 8         |
| Boo 2006 (15)           | Malaysia              | Yes          | 60            | 1       | 28.3                  | 1115.8                | PDA                  | Treatment         | NO                  | 3         | 2             | 3                | 8         |
| Bravo 2011 (16)         | Spain                 | Yes          | 90            | 1       | 28.4                  | 1066.7                | PDA                  | Treatment         | YES                 | 4         | 2             | 3                | 9         |
| Breatnach 2017a (17)    | Ireland               | No           | 121           | 1       | 26.8                  | 968.0                 | PDA                  | Any PDA           | NO                  | 3         | 2             | 3                | 8         |
| Breatnach 2017b (18)    | Ireland               | No           | 51            | 1       | 27                    | 1060                  | PDA                  | Any PDA           | NO                  | 3         | 1             | 3                | 7         |
| Brooks 2005 (19)        | Australia             | No           | 252           | 1       | 26.0                  | 900.5                 | PDA                  | Treatment         | YES                 | 3         | 2             | 3                | 8         |
| Brunner 2013 (20)       | Austria               | Yes          | 322           | 1       | 28.5                  | 1174.0                | PDA                  | Any PDA           | NO                  | 3         | 1             | 3                | 7         |

| First author, year    | Country         | Prospective? | Total infants | Centers | Mean/median GA cohort | Mean/median BW cohort | Independent variable | Outcomes                   | PDA primary outcome | Selection | Comparability | Outcome/Exposure | Total NOS |
|-----------------------|-----------------|--------------|---------------|---------|-----------------------|-----------------------|----------------------|----------------------------|---------------------|-----------|---------------|------------------|-----------|
| Buddhe 2012 (21)      | USA             | Yes          | 69            | 2       | 27.6                  | 981.0                 | PDA                  | hsPDA                      | YES                 | 3         | 1             | 3                | 7         |
| Cakir 2019 (22)       | Turkey          | No           | 799           | 1       | 28.0                  | 1068.2                | PDA                  | hsPDA                      | YES                 | 4         | 2             | 3                | 9         |
| Chen 2015 (23)        | China           | Yes          | 77            | 1       | 29.5                  | 1152.7                | PDA                  | Any PDA / Treatment        | NO                  | 3         | 1             | 3                | 7         |
| Chessex 2010 (24)     | Canada          | Yes          | 40            | 1       | 25.4                  | 752.0                 | Sex                  | hsPDA                      | NO                  | 2         | 2             | 3                | 7         |
| Chock 2011 (25)       | USA             | Yes          | 31            | 2       | 26.2                  | 850.9                 | PDA                  | hsPDA / Any PDA /Treatment | NO                  | 2         | 2             | 3                | 7         |
| Chock 2014 (26)       | USA             | No           | 187           | 1       | 27.6                  | 1004.9                | PDA                  | hsPDA                      | NO                  | 3         | 1             | 3                | 7         |
| Chock 2016 (27)       | USA             | Yes          | 47            | 1       | 27.2                  | 865.4                 | PDA                  | hsPDA / Any PDA            | NO                  | 3         | 2             | 3                | 8         |
| Choi 2005 (28)        | Korea           | Yes          | 66            | 1       | 29.9                  | 1356.0                | PDA                  | hsPDA                      | YES                 | 3         | 2             | 3                | 8         |
| Clyman 2020 (29)      | North America   | No           | 407           | 1       | 26.2                  | 831.3                 | PDA                  | hsPDA                      | NO                  | 3         | 1             | 3                | 7         |
| Collins 2018 (30)     | USA             | Yes          | 1090          | 8       | 33.0                  | 1410.8                | PDA                  | hsPDA / Any PDA            | NO                  | 4         | 1             | 3                | 8         |
| Coviello 2020 (31)    | Italy           | Yes          | 60            | 1       | 28.8                  | 1223.2                | PDA                  | hsPDA                      | YES                 | 3         | 2             | 3                | 8         |
| Dagle 2009 (32)       | USA             | No           | 366           | 1       | 27.9                  | 1042.9                | PDA                  | Any PDA                    | NO                  | 3         | 2             | 3                | 8         |
| Dagle 2019 (33)       | USA             | No           | 1013          | Multi   | 25.9                  | 762.7                 | PDA                  | hsPDA                      | YES                 | 4         | 1             | 3                | 8         |
| Dani 2008 (34)        | Italy           | Yes          | 34            | 1       | 25.6                  | 786.7                 | PDA                  | hsPDA /Any PDA /Treatment  | YES                 | 4         | 2             | 3                | 9         |
| Demir 2016 (35)       | Turkey          | No           | 235           | 1       | 29.0                  | 1548.5                | PDA                  | hsPDA                      | YES                 | 4         | 1             | 3                | 8         |
| Derzbach 2005 (36)    | Hungary         | No           | 140           | 1       | 29.0                  | 1189.8                | Sex                  | hsPDA                      | NO                  | 3         | 2             | 3                | 8         |
| Dix 2016 (37)         | The Netherlands | Yes          | 398           | 1       | 29.1                  | 1312.4                | PDA                  | hsPDA /Any PDA /Treatment  | YES                 | 3         | 1             | 3                | 7         |
| El-Khuffash 2008 (38) | Ireland         | Yes          | 80            | 1       | 28.0                  | 1060.0                | PDA                  | hsPDA /Any PDA             | NO                  | 3         | 2             | 3                | 8         |
| Elsmen 2004 (39)      | Sweden          | No           | 175           | 1       | 26.0                  | 771.0                 | Sex                  | hsPDA                      | NO                  | 3         | 1             | 3                | 7         |
| Engeseth 2020 (40)    | Germany         | Yes          | 228           | 1       | 26.7                  | 865.4                 | PDA                  | Any PDA / Treatment        | NO                  | 3         | 1             | 3                | 7         |
| Engür 2015 (41)       | Turkey          | No           | 63            | 1       | 29.8                  | 1330.8                | PDA                  | hsPDA/ Any PDA             | YES                 | 3         | 2             | 3                | 8         |

| First author, year    | Country     | Prospective? | Total infants | Centers | Mean/median GA cohort | Mean/median BW cohort | Independent variable | Outcomes             | PDA primary outcome | Selection | Comparability | Outcome/Exposure | Total NOS |
|-----------------------|-------------|--------------|---------------|---------|-----------------------|-----------------------|----------------------|----------------------|---------------------|-----------|---------------|------------------|-----------|
| Fink 2018 (42)        | Israel      | No           | 72            | 1       | 27.3                  | 1016.4                | PDA                  | hsPDA                | YES                 | 3         | 2             | 3                | 8         |
| Flood 2015 (43)       | USA         | No           | 221           | 1       | ND                    | 1680.0                | PDA                  | Any PDA              | YES                 | 3         | 2             | 3                | 8         |
| Furzan 1985 (44)      | USA         | Yes          | 120           | 1       | 29.4                  | 1165.0                | PDA                  | hsPDA                | YES                 | 4         | 2             | 3                | 9         |
| Ghirardello 2020 (45) | Italy       | Yes          | 151           | 1       | 29.1                  | 1098.4                | PDA                  | hsPDA                | YES                 | 3         | 1             | 3                | 7         |
| Godambe 2006 (46)     | Canada      | No           | 107           | 1       | 26.3                  | 887.4                 | PDA                  | Treatment            | YES                 | 3         | 2             | 3                | 8         |
| Gomez-Pomar 2017 (47) | USA         | Yes          | 31            | 1       | 26.0                  | 846.7                 | PDA                  | Any PDA              | NO                  | 2         | 2             | 3                | 7         |
| Goudjil 2013 (48)     | France      | Yes          | 44            | 1       | 28.5                  | 1209.5                | PDA                  | hsPDA                | NO                  | 3         | 1             | 3                | 7         |
| Griesmaier 2014 (49)  | Austria     | No           | 156           | 1       | 30.5                  | 1393.9                | PDA                  | Any PDA              | NO                  | 3         | 1             | 3                | 7         |
| Grosfeld 1996 (50)    | USA         | Yes          | 1016          | 1       | 28.4                  | 1053.8                | PDA                  | hsPDA/<br>Treatment  | NO                  | 4         | 1             | 3                | 8         |
| Halil 2018 (51)       | Turkey      | No           | 162           | 1       | 27.7                  | 986.2                 | PDA                  | Treatment            | YES                 | 3         | 1             | 3                | 7         |
| Halliday 1979 (52)    | USA         | Yes          | 36            | 1       | 27.9                  | 906.7                 | PDA                  | Treatment            | Yes                 | 3         | 1             | 3                | 7         |
| Hammoud 2003 (53)     | Kuwait      | No           | 101           | 1       | 29.9                  | 1094.4                | PDA                  | hsPDA                | YES                 | 3         | 1             | 3                | 7         |
| Härkin 2016 (54)      | Finland     | No           | 23            | 1       | 28.4                  | 1150                  | PDA                  | Treatment            | YES                 | 3         | 1             | 3                | 7         |
| Härkin 2018 (55)      | Finland     | No           | 3668          | Multi   | 29.1                  | 1243.0                | PDA                  | hsPDA /<br>Treatment | YES                 | 4         | 1             | 3                | 8         |
| Harris 2018 (56)      | New Zealand | No           | 51            | 1       | 27.8                  | 1093.8                | PDA                  | hsPDA                | NO                  | 3         | 2             | 3                | 8         |
| Harris 2020 (57)      | UK          | Yes          | 318           | Multi   | 26.9                  | 894.8                 | Sex                  | Any PDA              | NO                  | 3         | 1             | 4                | 8         |
| Hintz 2006 (58)       | USA         | No           | 2553          | 1       | 25.3                  | 767.1                 | Sex                  | Any PDA              | NO                  | 4         | 1             | 3                | 8         |
| Hoodbhoy 2009 (59)    | UK          | Yes          | 44            | 1       | 25.7                  | 763.9                 | PDA                  | Any PDA              | NO                  | 3         | 2             | 3                | 8         |
| Hsu 2010 (60)         | Taiwan      | Yes          | 31            | 1       | 30.0                  | 1396.0                | PDA                  | Treatment            | NO                  | 2         | 2             | 3                | 7         |
| Hsu 2019 (61)         | Taiwan      | No           | 18            | 1       | 27.6                  | 1075.0                | PDA                  | Treatment            | YES                 | 3         | 1             | 3                | 7         |
| Inayat 2015 (62)      | USA         | Yes          | 53            | 1       | 26.6                  | 971.9                 | PDA                  | hsPDA                | YES                 | 4         | 2             | 3                | 9         |
| Isayama 2015 (63)     | Japan,      | No           | 6183          | Multi   | 27.9                  | 1052.2                | PDA                  | hsPDA                | NO                  | 4         | 2             | 3                | 9         |

| First author, year      | Country   | Prospective? | Total infants | Centers | Mean/median GA cohort | Mean/median BW cohort | Independent variable | Outcomes          | PDA primary outcome | Selection | Comparability | Outcome/Exposure | Total NOS |
|-------------------------|-----------|--------------|---------------|---------|-----------------------|-----------------------|----------------------|-------------------|---------------------|-----------|---------------|------------------|-----------|
|                         | Canada    |              |               |         |                       |                       |                      |                   |                     |           |               |                  |           |
| Ito 2017 (64)           | Japan     | No           | 38023         | Multi   | 28.0                  | 1034                  | Sex                  | hsPDA             | NO                  | 4         | 1             | 3                | 8         |
| Janz-Robinson 2015 (65) | Australia | No           | 1473          | 10      | 26.5                  | 945.0                 | PDA                  | hsPDA / Treatment | NO                  | 4         | 1             | 3                | 8         |
| Jennische 2003 (66)     | Sweden    | No           | 64            | 1       | 28.9                  | 1306                  | Sex                  | hsPDA             | NO                  | 3         | 1             | 3                | 7         |
| Jhaveri 2010 (67)       | USA       | No           | 396           | 1       | 25.8                  | 828.6                 | PDA                  | Treatment         | YES                 | 3         | 1             | 3                | 7         |
| Jim 2005 (68)           | China     | Yes          | 77            | 1       | 28.2                  | 1087.2                | PDA                  | hsPDA             | NO                  | 4         | 2             | 3                | 9         |
| Jones 2005 (69)         | Canada    | Yes          | 3117          | 17      | 27.4                  | 1071                  | Sex                  | hsPDA             | NO                  | 4         | 2             | 3                | 9         |
| Juujärvi 2018 (70)      | Finland   | No           | 295           | 1       | 26.4                  | 821.7                 | PDA                  | Treatment         | YES                 | 3         | 1             | 3                | 7         |
| Kahvecioglu 2018 (71)   | Turkey    | Yes          | 60            | 1       | 27.8                  | 1024.6                | PDA                  | Any PDA           | YES                 | 3         | 1             | 3                | 7         |
| Kara 2019 (72)          | Turkey    | Yes          | 60            | 1       | 29.0                  | 1069.2                | PDA                  | hsPDA             | YES                 | 3         | 1             | 3                | 7         |
| Karabulut 2019 (73)     | Turkey    | No           | 148           | 2       | 28.8                  | 1092.0                | PDA                  | hsPDA             | YES                 | 3         | 2             | 3                | 8         |
| Katheria 2018 (74)      | USA       | No           | 292           | 1       | 28.4                  | 1202.1                | PDA                  | hsPDA             | YES                 | 3         | 2             | 3                | 8         |
| Kaur 2019 (75)          | Canada    | No           | 183           | 1       | 26.4                  | 870.0                 | PDA                  | Treatment         | YES                 | 3         | 1             | 3                | 7         |
| Kazanci 2019 (76)       | Turkey    | No           | 481           | 1       | 28.0                  | 1067.7                | PDA                  | hsPDA             | YES                 | 4         | 2             | 3                | 9         |
| Kent 2012 (77)          | Australia | No           | 2549          | 1       | 26.3                  | 923.0                 | Sex                  | hsPDA             | NO                  | 4         | 1             | 3                | 8         |
| Kim 2010 (78)           | Korea     | Yes          | 78            | 1       | 26.5                  | 742.0                 | PDA                  | Treatment         | YES                 | 2         | 2             | 3                | 7         |
| Kim 2012 (79)           | Korea     | Yes          | 28            | 1       | 32.7                  | 1918.0                | PDA                  | hsPDA             | YES                 | 2         | 2             | 3                | 7         |
| Kwinta 2009 (80)        | Poland    | Yes          | 60            | 1       | 28.5                  | 1087.0                | PDA                  | hsPDA             | YES                 | 4         | 2             | 3                | 9         |
| Laughon2007 (81)        | USA       | No           | 28413         | 220     | 28.2                  | 1089.7                | PDA                  | hsPDA             | YES                 | 3         | 2             | 3                | 8         |
| Lauterbach 2001 (82)    | USA       | No           | 51            | 1       | 32.3                  | 2009.9                | Sex                  | hsPDA             | NO                  | 2         | 1             | 3                | 6         |
| Ledo 2017 (83)          | Spain     | Yes          | 72            | 1       | 28.1                  | 1154.6                | PDA                  | hsPDA /Any PDA    | NO                  | 3         | 1             | 3                | 7         |
| Leonhardt 1987 (84)     | Germany   | Yes          | 32            | 1       | 30.0                  | 1095.0                | PDA                  | Treatment         | YES                 | 3         | 2             | 3                | 8         |
| Letshwiti 2014 (85)     | Ireland   | Yes          | 69            | 1       | 28.6                  | 1119.0                | PDA                  | hsPDA             | YES                 | 4         | 2             | 3                | 9         |

| First author, year    | Country          | Prospective? | Total infants | Centers | Mean/median GA cohort | Mean/median BW cohort | Independent variable | Outcomes       | PDA primary outcome | Selection | Comparability | Outcome/Exposure | Total NOS |
|-----------------------|------------------|--------------|---------------|---------|-----------------------|-----------------------|----------------------|----------------|---------------------|-----------|---------------|------------------|-----------|
| Li 2013 (86)          | Multiple country | No           | 289           | 1       | 27.7                  | 1089.0                | PDA                  | hsPDA          | NO                  | 2         | 2             | 3                | 7         |
| Louis 2018 (87)       | Canada           | No           | 98            | 1       | 25.4                  | 772.0                 | PDA                  | Treatment      | YES                 | 3         | 1             | 3                | 7         |
| Madan 2008 (88)       | USA              | No           | 210           | 1       | 26.3                  | 914.7                 | PDA                  | Treatment      | YES                 | 3         | 2             | 3                | 8         |
| Madan 2009 (89)       | USA              | Yes          | 2300          | Multi   | 25.2                  | 736.2                 | PDA                  | Treatment      | NO                  | 4         | 2             | 2                | 8         |
| Martin 1982 (90)      | USA              | Yes          | 20            | 1       | 31.2                  | 1629.5                | PDA                  | hsPDA /Any PDA | NO                  | 3         | 1             | 3                | 7         |
| Meinarde 2016 (91)    | Argentina        | No           | 88            | 1       | 28.4                  | 1112.0                | PDA                  | hsPDA          | YES                 | 3         | 1             | 3                | 7         |
| Mellander 1984 (92)   | USA              | Yes          | 42            | 1       | 27.8                  | 830.0                 | PDA                  | Treatment      | YES                 | 3         | 2             | 3                | 8         |
| Mine 2013 (93)        | Japan            | Yes          | 46            | 1       | 28.1                  | 954.4                 | PDA                  | hsPDA          | YES                 | 4         | 2             | 3                | 9         |
| Natarajan 2013 (94)   | USA              | No           | 968           | Multi   | 25.8                  | 761.5                 | PDA                  | hsPDA          | NO                  | 4         | 2             | 3                | 9         |
| Nemerofsky 2008 (95)  | USA              | Yes          | 125           | 1       | 27.5                  | 1019.0                | PDA                  | hsPDA          | YES                 | 4         | 2             | 3                | 9         |
| Neubauer 2012 (96)    | Austria          | Yes          | 408           | 1       | 29.3                  | 1259.2                | Sex                  | hsPDA          | NO                  | 4         | 1             | 3                | 8         |
| Nizarali 2012 (97)    | Portugal         | No           | 318           | 1       | 29.0                  | 1139.2                | PDA                  | hsPDA          | NO                  | 3         | 2             | 3                | 8         |
| Nuntnarumit 2009 (98) | Thailand         | Yes          | 35            | 1       | 30.3                  | 1322.3                | PDA                  | hsPDA          | YES                 | 2         | 2             | 3                | 7         |
| Oh 2020 (99)          | Korea            | No           | 92            | 1       | 27.0                  | 939.9                 | PDA                  | Treatment      | YES                 | 3         | 2             | 3                | 8         |
| Okur 2019 (100)       | Turkey           | Yes          | 119           | 1       | 28.6                  | 1068.6                | PDA                  | hsPDA          | YES                 | 3         | 1             | 3                | 7         |
| Oliveira 2016 (101)   | Portugal         | No           | 328           | 1       | 30.0                  | 1231.0                | PDA                  | Any PDA        | YES                 | 4         | 1             | 3                | 8         |
| Olsson 2018 (102)     | Sweden           | Yes          | 47            | 1       | 25.2                  | 738.3                 | PDA                  | hsPDA          | YES                 | 3         | 1             | 3                | 7         |
| Olsson 2019 (103)     | Sweden           | Yes          | 60            | 1       | 25.3                  | 732.3                 | PDA                  | hsPDA          | YES                 | 3         | 1             | 3                | 7         |
| Olukman 2017 (104)    | Turkey           | No           | 824           | 1       | 29.6                  | 1193.1                | PDA                  | hsPDA          | YES                 | 4         | 2             | 3                | 9         |
| O'Rourke 2008 (105)   | Ireland          | No           | 95            | 1       | 28.8                  | 1000.0                | PDA                  | hsPDA          | NO                  | 3         | 1             | 3                | 7         |
| Patole 2007 (106)     | Australia        | No           | 252           | 1       | 26.0                  | 900.5                 | PDA                  | hsPDA /Any PDA | NO                  | 4         | 2             | 3                | 9         |
| Peacock 2012 (107)    | United Kingdom   | Yes          | 797           | Multi   | 26.5                  | 853.0                 | Sex                  | Any PDA        | NO                  | 4         | 1             | 2                | 7         |

| First author, year   | Country   | Prospective? | Total infants | Centers | Mean/median GA cohort | Mean/median BW cohort | Independent variable | Outcomes                  | PDA primary outcome | Selection | Comparability | Outcome/Exposure | Total NOS |
|----------------------|-----------|--------------|---------------|---------|-----------------------|-----------------------|----------------------|---------------------------|---------------------|-----------|---------------|------------------|-----------|
| Pees 2010 (108)      | Germany   | Yes          | 15            | 1       | 26.2                  | 853.8                 | PDA                  | hsPDA / Treatment         | YES                 | 2         | 2             | 3                | 7         |
| Pereira 2018 (109)   | UK        | No           | 59            | 1       | 25.8                  | 817.0                 | PDA                  | hsPDA / Treatment         | YES                 | 3         | 2             | 3                | 8         |
| Polat 2016 (110)     | Turkey    | Yes          | 58            | 1       | 26.6                  | 824.1                 | PDA                  | hsPDA                     | YES                 | 2         | 2             | 3                | 7         |
| Pourarian 2017 (111) | Iran      | Yes          | 200           | 1       | 32.1                  | 1741.0                | PDA                  | hsPDA /Any PDA            | YES                 | 3         | 1             | 3                | 7         |
| Reller 1985 (112)    | USA       | Yes          | 50            | 1       | 29.2                  | 1166.4                | PDA                  | hsPDA                     | YES                 | 3         | 1             | 3                | 7         |
| Rodriguez 2018 (113) | Spain     | Yes          | 85            | 1       | 29.8                  | 1222.6                | PDA                  | hsPDA                     | YES                 | 4         | 2             | 3                | 9         |
| Romagnoli 2018 (114) | USA       | Yes          | 65            | 1       | 27.5                  | 1019.0                | BW                   | Any PDA                   | YES                 | 2         | 1             | 3                | 6         |
| Rooney 2019 (115)    | USA       | Yes          | 144           | 1       | 26.0                  | ND                    | PDA                  | Treatment                 | YES                 | 2         | 2             | 3                | 7         |
| Sadeck 2014 (116)    | Brazil    | No           | 494           | 16      | 27.3                  | 787.1                 | PDA                  | hsPDA / Treatment         | YES                 | 3         | 1             | 3                | 7         |
| Sallmon 2012 (117)   | Germany   | No           | 1350          | 2       | 28.3                  | 1060.0                | PDA                  | hsPDA /Any PDA /Treatment | YES                 | 4         | 2             | 3                | 9         |
| Sallmon 2018 (118)   | Germany   | No           | 471           | 2       | 26.0                  | 867.0                 | PDA                  | Treatment                 | YES                 | 3         | 2             | 3                | 8         |
| Sanjeev 2005 (119)   | USA       | Yes          | 29            | 2       | 26.3                  | 873.5                 | PDA                  | hsPDA                     | YES                 | 3         | 2             | 2                | 7         |
| Schwarz 2018 (120)   | Germany   | Yes          | 22            | 1       | 28.6                  | 1076.0                | PDA                  | hsPDA                     | YES                 | 3         | 1             | 3                | 7         |
| Sellmer 2013 (121)   | Denmark   | Yes          | 183           | 1       | 28.1                  | 1066.1                | PDA                  | hsPDA/ Any PDA            | NO                  | 3         | 1             | 3                | 7         |
| Semberova 2017 (122) | Ireland   | No           | 280           | 3       | 28.9                  | 1126.3                | PDA                  | Any PDA                   | YES                 | 3         | 2             | 3                | 8         |
| Seon 2013 (123)      | Korea     | No           | 58            | 1       | 27.1                  | 946.0                 | PDA                  | Treatment                 | NO                  | 3         | 1             | 2                | 6         |
| Shah 2011 (124)      | USA       | Yes          | 497           | 1       | 25.8                  | 825.1                 | PDA                  | Any PDA /Treatment        | YES                 | 3         | 2             | 3                | 8         |
| Skiold 2014 (125)    | Sweden    | Yes          | 107           | 1       | 25.6                  | 800.6                 | Sex                  | hsPDA                     | NO                  | 3         | 1             | 3                | 7         |
| Stark 2011 (126)     | Australia | Yes          | 60            | 1       | 30.0                  | 1287.5                | BW                   | hsPDA                     | NO                  | 3         | 1             | 3                | 7         |
| Steiner 2015 (127)   | Austria   | No           | 34            | 1       | 26.0                  | 807.0                 | Sex                  | Treatment                 | YES                 | 2         | 2             | 3                | 7         |
| Stevenson 2000 (128) | USA       | No           | 6738          | 12      | 28,5                  | ~1100                 | Sex                  | hsPDA                     | NO                  | 4         | 1             | 3                | 8         |
| Strauss 2011 (129)   | Israel    | No           | 120           | 1       | 27.9                  | 1019.0                | PDA                  | hsPDA                     | YES                 | 3         | 2             | 3                | 8         |

| First author, year    | Country     | Prospective? | Total infants | Centers | Mean/median GA cohort | Mean/median BW cohort | Independent variable | Outcomes       | PDA primary outcome | Selection | Comparability | Outcome/Exposure | Total NOS |
|-----------------------|-------------|--------------|---------------|---------|-----------------------|-----------------------|----------------------|----------------|---------------------|-----------|---------------|------------------|-----------|
| Tauber 2016 (130)     | USA         | Yes          | 95            | 1       | 28.5                  | 1185.2                | PDA                  | hsPDA/ Any PDA | NO                  | 3         | 2             | 3                | 8         |
| Terek 2014 (131)      | Turkey      | No           | 292           | 1       | 29.7                  | 1470.2                | PDA                  | hsPDA/ Any PDA | YES                 | 3         | 1             | 3                | 7         |
| Tioseco 2006 (132)    | USA         | No           | 833           | 1       | 30.9                  | 1546.8                | Sex                  | hsPDA          | NO                  | 4         | 2             | 2                | 8         |
| Uchiyama 2011 (133)   | Japan       | No           | 57            | 1       | 28.3                  | 1040.6                | PDA                  | Treatment      | NO                  | 2         | 2             | 3                | 7         |
| Vaidya 2021 (134)     | USA         | No           | 66            | 1       | 25.5                  | 783                   | BW                   | Treatment      | YES                 | 3         | 1             | 3                | 7         |
| Van de Bor 1988 (135) | Netherlands | No           | 1252          | Multi   | 30.5                  | 1269.7                | PDA                  | hsPDA          | NO                  | 4         | 2             | 3                | 9         |
| Velazquez 2018 (136)  | USA         | No           | 151           | 1       | 26.0                  | 800.3                 | PDA                  | hsPDA          | NO                  | 3         | 1             | 3                | 7         |
| Vieux 2010 (137)      | France      | No           | 148           | 3       | 28.3                  | 1114.3                | PDA                  | hsPDA          | NO                  | 3         | 1             | 3                | 7         |
| Visconti 2013 (138)   | Brazil      | No           | 67            | 1       | 28.2                  | 1063.3                | PDA                  | hsPDA          | YES                 | 4         | 2             | 3                | 9         |
| Weiss 1995 (139)      | USA         | Yes          | 77            | 1       | 27.8                  | 1076.6                | PDA                  | Treatment      | YES                 | 3         | 1             | 3                | 7         |
| Weisz 2017 (140)      | Canada      | No           | 754           | 3       | 25.8                  | 812.3                 | PDA                  | Treatment      | YES                 | 4         | 1             | 3                | 8         |
| Yang 2008 (141)       | Singapore   | No           | 139           | 1       | 26.3                  | 807.3                 | PDA                  | Treatment      | NO                  | 3         | 1             | 3                | 7         |
| Yoon 2007 (142)       | Korea       | No           | 29            | 3       | 31.4                  | 1651.2                | PDA                  | Treatment      | YES                 | 3         | 1             | 3                | 7         |
| Yum 2018 (143)        | Korea       | Yes          | 71            | 1       | 27.9                  | 1038.3                | PDA                  | hsPDA          | YES                 | 3         | 2             | 3                | 8         |
| Zanardo 2008 (144)    | Italy       | Yes          | 46            | 1       | 27.5                  | 1031.3                | PDA                  | Treatment      | YES                 | 3         | 1             | 3                | 7         |
| Zisk 2011 (145)       | USA         | No           | 12807         | Multi   | 29.4                  | 1358.6                | Sex                  | hsPDA/ Any PDA | NO                  | 4         | 2             | 3                | 9         |
| Zozaya 2019 (146)     | Spain       | No           | ND            | Multi   | ND                    | ND                    | Sex                  | hsPDA          | NO                  | 4         | 1             | 3                | 8         |

hs: hemodynamically significant; NOS: Newcastle-Ottawa Scale; PDA: patent ductus arteriosus

1. Adrouche-Amrani, L.; Green, R.S.; Gluck, K.M.; Lin, J. Failure of a repeat course of cyclooxygenase inhibitor to close a PDA is a risk factor for developing chronic lung disease in ELBW infants. *BMC Pediatr.* **2012**, *12*, 10. <https://doi.org/10.1186/1471-2431-12-10>.



2. Ahamed, M.; Verma, P.; Lee, S.; Vega, M.; Wang, D.; Kim, M.; Fuloria, M. Predictors of successful closure of patent ductus arteriosus with indomethacin. *J. Perinatol.* **2015**, *35*, 729. <https://doi.org/10.1038/jp.2015.33>.
3. Ahmed, E.G.; Samra, N.M.; Amin, S.A.; Borayek, H.A.; Abdelrazek, G. Platelets and platelet derived growth factor and ductus arteriosus in preterm neonates. *Progress in Pediatr. Cardiol.* **2020**, 101226. <https://doi.org/10.1016/j.ppedcard.2020.101226>.
4. Aikio, O.; Harkin, P.; Saarela, T.; Hallman, M. Early paracetamol treatment associated with lowered risk of persistent ductus arteriosus in very preterm infants. *J Matern Fetal Neonatal Med.* **2014**, *27*, 1252-1256. <https://doi.org/10.3109/14767058.2013.854327>
5. Akar, S.; Topcuoglu, S.; Tuten, A.; Ozalkaya, E.; Karatepe, H.O.; Gokmen, T.; Ovali, F.; Karatekin, G. Is the First Postnatal Platelet Mass as an Indicator of Patent Ductus Arteriosus? *Arch. Iran. Med.* **2019**, *22*, 687.
6. Alan, S.; Karadeniz, C.; Okulu, E.; Kilic, A.; Erdeve, O.; Ucar, T.; Atasay, B.; Atalay, S.; Arsan, S. Management of patent ductus arteriosus in preterm infants: clinical judgment might be a fair option. *J. Matern.-Fetal Neonatal Med.* **2013**, *26*, 1850-1854. <https://doi.org/10.3109/14767058.2013.801956>.
7. Antonucci, R.; Cuzzolin, L.; Arceri, A.; Dessì, A.; Fanos, V. Changes in urinary PGE 2 after ibuprofen treatment in preterm infants with patent ductus arteriosus. *Eur. J. Clin. Pharmacol.* **2009**, *65*, 223-230. <https://doi.org/10.1007/s00228-008-0586-3>.
8. Asrani, P.; Aly, A. M.; Jiwani, A. K.; Niebuhr, B. R.; Christenson, R.H.; Jain, S.K.; High-sensitivity troponin T in preterm infants with a hemodynamically significant patent ductus arteriosus. *J. Perinatol.* **2018** *38*(11), 1483-1489. <https://doi.org/10.1038/s41372-018-0192-x>
9. Bas-Suárez, M.P.; González-Luis, G.E.; Saavedra, P.; Villamor, E. Platelet counts in the first seven days of life and patent ductus arteriosus in preterm very low-birth-weight infants. *Neonatology* **2014**, *106*, 188-194. <https://doi.org/10.1159/000362432>.
10. Becerra, G.H.; Bernárdez Zapata, I.; Iglesias Leboeiro, J.; Bahena, E.J.P.; Rendón Macías, M.E. Medical care of children < 30 weeks gestation with ductus arteriosus persistent. *Rev. Mex. de Pediatría* **2013**, *80*, 131-135.
11. Bekmez, B. Ö.; Tayman, C.; Büyüktiryaki, M.; Çetinkaya, A K; Çakır, U.; Derme, T. A promising, novel index in the diagnosis and follow-up of patent ductus arteriosus: Red cell distribution width-to-platelet ratio. *J. Clin. Lab. Anal.* **2018** *32*(9):e22616. <https://doi.org/10.1002/jcla.22616>.
12. Bertino, E.; Coscia, A.; Boni, L.; Rossi, C.; Martano, C.; Giuliani, F.; Fabris, C.; Spada, E.; Zolin, A.; Milani, S. Weight growth velocity of very low birth weight infants: role of gender, gestational age and major morbidities. *Early Hum. Dev.* **2009**, *85*, 339-347. <https://doi.org/10.1016/j.earlhumdev.2008.12.014>.
13. Boghossian, N.S.; Geraci, M.; Edwards, E.M.; Horbar, J.D. Sex differences in mortality and morbidity of infants born at less than 30 weeks' gestation. *Pediatrics.* **2018**, *142*. <https://doi.org/10.1542/peds.2018-2352>.
14. Bonamy, A.-K.E.; Gudmundsdottir, A.; Maier, R.F.; Toome, L.; Zeitlin, J.; Bonet, M.; Fenton, A.; Hasselager, A.B.; Van Heijst, A.; Gortner, L. Patent ductus arteriosus treatment in very preterm infants: a European population-based cohort study (EPICE) on variation and outcomes. *Neonatology* **2017**, *111*, 367-375. <https://doi.org/10.1159/000454798>.
15. Boo, N.Y.; Mohd-Amin, I.; Bilkis, A.; Yong-Junina, F. Predictors of failed closure of patent ductus arteriosus with indomethacin. *Singapore Med J* **2006**, *47*, 763. <https://doi.org/10.1080/02841850600731415>
16. Bravo Laguna, M.C. Evaluación del tratamiento farmacológico convencional para el cierre del ductus arterioso persistente en el recién nacido pretérmino: impacto de nuevas líneas terapéuticas. **2011**. [https://repositorio.uam.es/bitstream/handle/10486/7350/41683\\_bravo\\_laguna\\_mari\\_carmen.pdf?sequence=1](https://repositorio.uam.es/bitstream/handle/10486/7350/41683_bravo_laguna_mari_carmen.pdf?sequence=1)
17. Breatnach, C.R.; Franklin, O.; James, A.T.; McCallion, N.; Afif, E.-K. The impact of a hyperdynamic left ventricle on right ventricular function measurements in preterm infants with a patent ductus arteriosus. *Arch. Dis. Child. Fetal Neonatal Ed.* **2017**, *102*, F446-F450. <https://doi.org/10.1136/archdischild-2016-311189>.

18. Breatnach, C.R.; Franklin, O.; McCallion, N.; Afif, E.-K. The effect of a significant patent ductus arteriosus on Doppler flow patterns of preductal vessels: an assessment of the brachiocephalic artery. *J Pediatr.* **2017**, *180*, 279-281. e271. <https://doi.org/10.1016/j.jpeds.2016.09.029>.
19. Brooks, J.; Travadi, J.; Patole, S.; Doherty, D.; Simmer, K. Is surgical ligation of patent ductus arteriosus necessary? The Western Australian experience of conservative management. *Arch. Dis. Child. Fetal Neonatal Ed.* **2005**, *90*, F235-F239. <https://doi.org/10.1136/adc.2004.057638>.
20. Brunner, B.; Hoeck, M.; Schermer, E.; Streif, W.; Kiechl-Kohlendorfer, U. Patent ductus arteriosus, low platelets, cyclooxygenase inhibitors, and intraventricular hemorrhage in very low birth weight preterm infants. *J. Pediatr.* **2013**, *163*, 23-28. <https://doi.org/10.1071/PVv2013n163other>
21. Buddhé, S.; Dhuper, S.; Kim, R.; Weichbrod, L.; Mahdi, E.; Shah, N.; Kona, S.; Sokal, M. NT-proBNP levels improve the ability of predicting a hemodynamically significant patent ductus arteriosus in very low-birth-weight infants. *J. Clin. Neonatol.* **2012**, *1*, 82. <https://doi.org/10.4103/2249-4847.96758>.
22. Cakir, U.; Tayman, C. A mystery of patent ductus arteriosus and serum osmolality in preterm infants. *American J. Perinatol.* **2019**, *36*, 641-646. <https://doi.org/10.1055/s-0038-1673397>.
23. Chen, H.-L.; Yang, R.-C.; Lee, W.-T.; Lee, P.-L.; Hsu, J.-H.; Wu, J.-R.; Dai, Z.-K. Lung function in very preterm infants with patent ductus arteriosus under conservative management: an observational study. *BMC Pediatr.* **2015**, *15*, 1-6. <https://doi.org/10.1186/s12887-015-0480-y>.
24. Chessex, P.; Khashu, M.; Harrison, A.; Hosking, M.; Sargent, M.; Lavoie, J.-C. Early life events, sex, and arterial blood pressure in critically ill infants. *Pediatr. Crit. Care Med.* **2010**, *11*, 75-81. <https://doi.org/10.1097/PCC.0b013e3181b010f8>.
25. Chock, V.Y.; Pun, R.; Oza, A.; Benitz, W.E.; Van Meurs, K.P.; Whittemore, A.S.; Behzadian, F.; Silverman, N.H. Predictors of bronchopulmonary dysplasia or death in premature infants with a patent ductus arteriosus. *Pediatr. Res.* **2014**, *75*, 570. <https://doi.org/10.1038/pr.2013.253>.
26. Chock, V.Y.; Ramamoorthy, C.; Van Meurs, K.P. Cerebral oxygenation during different treatment strategies for a patent ductus arteriosus. *Neonatology* **2011**, *100*, 233-240. <https://doi.org/10.1159/000325149>.
27. Chock, V.Y.; Rose, L.A.; Mante, J.V.; Pun, R. Near-infrared spectroscopy for detection of a significant patent ductus arteriosus. *Pediatr. Res.* **2016**, *80*, 675. <https://doi.org/10.1038/pr.2016.148>.
28. Choi, B.M.; Lee, K.H.; Eun, B.L.; Yoo, K.H.; Hong, Y.S.; Son, C.S.; Lee, J.W. Utility of rapid B-type natriuretic peptide assay for diagnosis of symptomatic patent ductus arteriosus in preterm infants. *Pediatrics-English Edition* **2005**, *115*, e255. <https://doi.org/10.1542/peds.2004-1837>.
29. Clyman, R.I.; Hills, N.K. The effect of prolonged tracheal intubation on the association between patent ductus arteriosus and bronchopulmonary dysplasia (grades 2 and 3). *J. Perinatol.* **2020**, *40*, 1358-1365. <https://doi.org/10.1038/s41372-020-0718-x>.
30. Collins, R.T., 2nd; Lyle, R.E.; Rettiganti, M.; Gossett, J.M.; Robbins, J.M.; Casey, P.H. Long-Term Neurodevelopment of Low-Birthweight, Preterm Infants with Patent Ductus Arteriosus. *J. Pediatr.* **2018**, *203*, 170-176 e171. <https://doi.org/10.1016/j.jpeds.2018.08.004>
31. Coviello, C.; Tataranno, M.L.; Corsini, I.; Leonardi, V.; Longini, M.; Bazzini, F.; Buonocore, G.; Dani, C. Isoprostanes as biomarker for patent ductus arteriosus in preterm infants. *Front. Pediatr.* **2020**, *8*, 555. <https://doi.org/10.3389/fped.2020.00555>.
32. Dagle, J.M.; Lepp, N.T.; Cooper, M.E.; Schaa, K.L.; Kelsey, K.J.; Orr, K.L.; Caprau, D.; Zimmerman, C.R.; Steffen, K.M.; Johnson, K.J. Determination of genetic predisposition to patent ductus arteriosus in preterm infants. *Pediatrics* **2009**, *123*, 1116. <https://doi.org/10.1542/peds.2008-0313>.
63. Dagle, J.M.; Ryckman, K.K.; Spracklen, C.N.; Momany, A.M.; Cotten, C.M.; Levy, J.; Page, G.P.; Bell, E.F.; Carlo, W.A.; Shankaran, S. Genetic variants associated with patent ductus arteriosus in extremely preterm infants. *J. Perinatol.* **2019**, *39*, 401. <https://doi.org/10.1038/s41372-018-0285-6>.
34. Dani, C.; Bertini, G.; Corsini, I.; Elia, S.; Vangi, V.; Pratesi, S.; Rubaltelli, F.F. The fate of ductus arteriosus in infants at 23-27 weeks of gestation: from spontaneous closure to ibuprofen resistance. *Acta Paediatr.* **2008**, *97*, 1176-1180. <https://doi.org/10.1111/j.1651-2227.2008.00871.x>

35. Demir, N.; Peker, E.; Ece, İ.; Ağengin, K.; Bulan, K.A.; Tuncer, O. Is platelet mass a more significant indicator than platelet count of closure of patent ductus arteriosus? *J. Matern.-Fetal Neonatal Med.* **2016**, *29*, 1915-1918. <https://doi.org/10.3109/14767058.2015.1067296>.
36. Derzbach, L.; Treszl, A.; Balogh, Á.; Vásárhelyi, B.; Tulassay, T.; Rigó J, J. Gender dependent association between perinatal morbidity and estrogen receptor-alpha PvuII polymorphism. *J. Perinat Med.* **2005**, *33*(5):461-2. <https://doi.org/10.1515/JPM.2005.082>.
37. Dix, L.; Molenschot, M.; Breur, J.; de Vries, W.; Vijlbrief, D.; Groenendaal, F.; Van Bel, F.; Lemmers, P. Cerebral oxygenation and echocardiographic parameters in preterm neonates with a patent ductus arteriosus: an observational study. *Arch. Dis. Child. Fetal Neonatal Ed.* **2016**, *101*, F520-F526. <https://doi.org/10.1136/archdischild-2015-309192>.
38. El-Khuffash, A.F.; Molloy, E.J. Influence of a patent ductus arteriosus on cardiac troponin T levels in preterm infants. *J. Pediatr.* **2008**, *153*, 350-353. <https://doi.org/10.1016/j.jpeds.2008.04.014>.
39. Elsmen, E.; Hansen Pupp, I.; Hellstrom-Westas, L. Preterm male infants need more initial respiratory and circulatory support than female infants. *Acta Paediatr* **2004**, *93*, 529-533. <https://doi.org/10.1080/08035250410024998>.
40. Engeseth, M.S.; Engan, M.; Clemm, H.; Vollsæter, M.; Nilsen, R.M.; Markestad, T.; Halvorsen, T.; Røksund, O.D. Voice and Exercise Related Respiratory Symptoms in Extremely Preterm Born Children After Neonatal Patent Ductus Arteriosus. *Front. Pediatr.* **2020**, *8*, 150. <https://doi.org/10.3389/fped.2020.00150>.
41. Engür, D.; Kaynak-Türkmen, M.; Deveci, M.; Yenisey, Ç. Platelets and platelet-derived growth factor in closure of the ductus arteriosus. *Turk J. Pediatr.* **2015**, *57*, 242-247. <https://doi.org/10.1787/qna-v2015-1-32-fr>
42. Fink, D.; Nitzan, I.; Bin-Nun, A.; Mimouni, F.; Hammerman, C. Ductus arteriosus outcome with focus on the initially patent but hemodynamically insignificant ductus in preterm neonates. *J. Perinatol.* **2018**, *38*, 1526. <https://doi.org/10.1038/s41372-018-0204-x>.
43. Flood, T.; Guthrie, J.D. Echocardiographic markers for the prediction of nonclosure of the patent ductus arteriosus in premature neonates. *J. Diagn. Med. Sonogr.* **2015**, *31*, 22-27. <https://doi.org/10.1177/8756479314563538>.
44. Furzan, J.A.; Reisch, J.; Tyson, J.E.; Laird, P.; Rosenfeld, C.R. Incidence and risk factors for symptomatic patent ductus arteriosus among inborn very-low-birth-weight infants. *Early Hum. Dev.* **1985**, *12*, 39-48. [https://doi.org/10.1016/0378-3782\(85\)90135-5](https://doi.org/10.1016/0378-3782(85)90135-5).
45. Ghirardello, S.; Raffaelli, G.; Crippa, B.L.; Gulden, S.; Amodeo, I.; Consonni, D.; Cavallaro, G.; Schena, F.; Mosca, F. The Thromboelastographic Profile at Birth in Very Preterm Newborns with Patent Ductus Arteriosus. *Neonatology* **2020**, *117* (3), 316-323. <https://doi.org/10.1159/000507553>.
46. Godambe, S.; Newby, B.; Shah, V.; Shah, P.S. Effect of indomethacin on closure of ductus arteriosus in very-low-birthweight neonates 1. *Acta Pædiatrica* **2006**, *95*, 1389-1393. <https://doi.org/10.1080/08035250600615150>.
47. Gomez-Pomar, E.; Makhoul, M.; Westgate, P.M.; Ibonia, K.T.; Patwardhan, A.; Giannone, P.J.; Bada, H.S.; Jawdeh, E.G.A. Relationship between perfusion index and patent ductus arteriosus in preterm infants. *Pediatr. Res.* **2017**, *81*, 775. <https://doi.org/10.1038/pr.2017.10>.
48. Goudjil, S.; Imestouren, F.; Chazal, C.; Ghostine, G.; Wallois, F.; Leke, A.; Kongolo, G. Patent ductus arteriosus in preterm infants is associated with cardiac autonomic alteration and predominant parasympathetic stimulation. *Early Hum. Dev.* **2013**, *89*, 631-634. <https://doi.org/10.1016/j.earlhumdev.2013.04.008>.
49. Griesmaier, E.; Santuari, E.; Edlinger, M.; Neubauer, V.; Waltner-Romen, M.; Kiechl-Kohlendorfer, U. Differences in the maturation of amplitude-integrated EEG signals in male and female preterm infants. *Neonatology* **2014**, *105*, 175-181. <https://doi.org/10.1159/000356782>.
50. Grosfeld, J.L.; Chaet, M.; Molinari, F.; Engle, W.; Engum, S.A.; West, K.W.; Rescorla, F.J.; Scherer 3rd, L. Increased risk of necrotizing enterocolitis in premature infants with patent ductus arteriosus treated with indomethacin. *Annals of surgery* **1996**, *224*, 350. <https://doi.org/10.1097/00000658-199609000-00011>.

51. Halil, H.; Buyuktiryaki, M.; Atay, F.Y.; Yekta Oncel, M.; Uras, N. Reopening of the ductus arteriosus in preterm infants; Clinical aspects and subsequent consequences. *J. Neonatal-Perinat. Med.* **2018**, 1-7. <https://doi.org/10.3233/NPM-17136>.
52. Halliday, H.; Hirata, T.; Brady, J. Indomethacin therapy for large patent ductus arteriosus in the very low birth weight infant: results and complications. *Pediatrics* **1979**, 64, 154-159. <https://doi.org/10.1542/peds.64.2.154>.
53. Hammoud, M.S.; Elsofi, H.A.; Hanafi, E.A.; Shalabi, A.A.; Fouda, I.A.; Devarajan, L.V. Incidence and risk factors associated with the patency of ductus arteriosus in preterm infants with respiratory distress syndrome in Kuwait. *Saudi Med J.* **2003**, 24, 982-985.
54. Härkin, P.; Härmä, A.; Aikio, O.; Valkama, M.; Leskinen, M.; Saarela, T.; Hallman, M. Paracetamol accelerates closure of the ductus arteriosus after premature birth: a randomized trial. *J Pediatr.* **2016**, 177, 72-77. e72. <https://doi.org/10.1016/j.jpeds.2016.04.066>.
55. Härkin, P.; Marttila, R.; Pokka, T.; Saarela, T.; Hallman, M. Morbidities associated with patent ductus arteriosus in preterm infants. Nationwide cohort study. *J. Matern.-Fetal Neonatal Med.* **2018**, 31, 2576-2583. <https://doi.org/10.1080/14767058.2017.1347921>.
56. Harris, C.; Zivanovic, S.; Lunt, A.; Calvert, S.; Bisquera, A.; Marlow, N.; Peacock, J.L.; Greenough, A. Lung function and respiratory outcomes in teenage boys and girls born very prematurely. *Pediatr. Pulmonol.* **2020**, 55, 682-689. <https://doi.org/10.1002/ppul.24631>.
57. Harris, S.L.; More, K.; Dixon, B.; Troughton, R.; Pemberton, C.; Horwood, J.; Ellis, N.; Austin, N. Factors affecting N-terminal pro-B-type natriuretic peptide levels in preterm infants and use in determination of haemodynamic significance of patent ductus arteriosus. *Eur. J. Pediatr.* **2018**, 177, 521-532. <https://doi.org/10.1007/s00431-018-3089-5>.
58. Hintz, S.R.; Kendrick, D.E.; Vohr, B.R.; Poole, W.K.; Higgins, R.D.; Network, N.N.R. Gender differences in neurodevelopmental outcomes among extremely preterm, extremely-low-birthweight infants. *Acta Paediatr.* **2006**, 95, 1239-1248. <https://doi.org/10.1080/08035250600599727>.
59. Hoodbhoy, S.A.; Cutting, H.A.; Seddon, J.A.; Campbell, M.E. Cerebral and splanchnic hemodynamics after duct ligation in very low birth weight infants. *J Pediatr.* **2009**, 154, 196-200. e192. <https://doi.org/10.1016/j.jpeds.2008.07.051>.
60. Hsu, J.-H.; Yang, S.-N.; Chen, H.-L.; Tseng, H.-I.; Dai, Z.-K.; Wu, J.-R. B-type natriuretic peptide predicts responses to indomethacin in premature neonates with patent ductus arteriosus. *J Pediatr.* **2010**, 157, 79-84. <https://doi.org/10.1016/j.jpeds.2009.12.045>.
61. Hsu, K.-H.; Wu, T.-W.; Wu, I.-H.; Lai, M.-Y.; Hsu, S.-Y.; Huang, H.-W.; Mok, T.-Y.; Lee, C.-C.; Lien, R. Baseline cardiac output and its alterations during ibuprofen treatment for patent ductus arteriosus in preterm infants. *BMC Pediatr.* **2019**, 19, 1-8. <https://doi.org/10.1186/s12887-019-1560-1>.
62. Inayat, M.; Bany-Mohammed, F.; Valencia, A.; Tay, C.; Jacinto, J.; Aranda, J.V.; Beharry, K.D. Antioxidants and biomarkers of oxidative stress in preterm infants with symptomatic patent ductus arteriosus. *American J. Perinatol.* **2015**, 32, 895-904. <https://doi.org/10.1055/s-0035-1544948>.
63. Isayama, T.; Mirea, L.; Mori, R.; Kusuda, S.; Fujimura, M.; Lee, S.K.; Shah, P.S.; Japan, N.R.N.o.; Network, C.N. Patent ductus arteriosus management and outcomes in Japan and Canada: comparison of proactive and selective approaches. *American J. Perinatol.* **2015**, 32, 1087-1094. <https://doi.org/10.1055/s-0035-1548727>.
64. Ito, M.; Tamura, M.; Namba, F.; Japan, N.R.N.o. Role of sex in morbidity and mortality of very premature neonates. *Pediatr. Int.* **2017**, 59, 898-905. <https://doi.org/10.1111/ped.13320>.
65. Janz-Robinson, E.M.; Badawi, N.; Walker, K.; Bajuk, B.; Abdel-Latif, M.E.; Bowen, J.; Sedgley, S.; Carlisle, H.; Smith, J.; Craven, P. Neurodevelopmental outcomes of premature infants treated for patent ductus arteriosus: a population-based cohort study. *J Pediatr.* **2015**, 167, 1025-1032. e1023. <https://doi.org/10.1016/j.jpeds.2015.06.054>.
66. Jennische, M.; Sedin, G. Gender differences in outcome after neonatal intensive care: speech and language skills are less influenced in boys than in girls at 6.5 years. *Acta Paediatr.* **2003**, 92, 364-378. <https://doi.org/10.1111/j.1651-2227.2003.tb00560.x>.

67. Jhaveri, N.; Moon-Grady, A.; Clyman, R.I. Early surgical ligation versus a conservative approach for management of patent ductus arteriosus that fails to close after indomethacin treatment. *J Pediatr.* **2010**, *157*, 381-387. e381. <https://doi.org/10.1016/j.jpeds.2010.02.062>.
68. Jim, W.-T.; Chiu, N.-C.; Chen, M.-R.; Hung, H.-Y.; Kao, H.-A.; Hsu, C.-H.; Chang, J.-H. Cerebral hemodynamic change and intraventricular hemorrhage in very low birth weight infants with patent ductus arteriosus. *Ultrasound Med. Biol.* **2005**, *31*, 197-202. <https://doi.org/10.1016/j.ultrasmedbio.2004.10.006>.
69. Jones, H.P.; Karuri, S.; Cronin, C.M.; Ohlsson, A.; Peliowski, A.; Synnes, A.; Lee, S.K. Actuarial survival of a large Canadian cohort of preterm infants. *BMC Pediatr.* **2005**, *5*, 1-13. <https://doi.org/10.1186/1471-2431-5-40>.
70. Juujärvi, S.; Saarela, T.; Hallman, M.; Aikio, O. Intravenous paracetamol was associated with closure of the ductus arteriosus in extremely premature infants. *Acta Paediatr.* **2018**, *107*, 605-610. <https://doi.org/10.1111/apa.14137>.
71. Kahvecioglu, D.; Erdev, O.; Akduman, H.; Ucar, T.; Alan, S.; Çakır, U.; Yıldız, D.; Atasay, B.; Arsan, S.; Atalay, S. Influence of platelet count, platelet mass index, and platelet function on the spontaneous closure of ductus arteriosus in the prematurity. *Pediatr. Neonatol* **2018**, *59*, 53-57. <https://doi.org/10.1016/j.pedneo.2017.01.006>.
72. Kara, M.; Bilen, M.M.; Tekgündüz, K.Ş.; Laloğlu, F.; Ceviz, N. Relation of shunt index with the patent ductus arteriosus among preterm infants under 30 weeks or 1500 g. *J. Matern.-Fetal Neonatal Med.* **2019**, 1-6. <https://doi.org/10.1080/14767058.2019.1594191>.
73. Karabulut, B.; Arcagök, B.C.; Simsek, A. Utility of the Platelet-to-Lymphocyte Ratio in Diagnosing and Predicting Treatment Success in Preterm Neonates with Patent Ductus Arteriosus. *Fetal Pediatr. Pathol.* **2019**, 1-10. <https://doi.org/10.1080/15513815.2019.1686786>.
74. Katheria, V.; Poeltler, D.; Brown, M.; Hassen, K.; Patel, D.; Rich, W.; Finer, N.; Katheria, A. Early prediction of a significant patent ductus arteriosus in infants < 32 weeks gestational age. *J. Neonatal-Perinat. Med.* **2018**, 1-7. <https://doi.org/10.3233/NPM-1771>.
75. Kaur, S.; Stritzke, A.; Soraisham, A.S. Does Postmenstrual Age Affect Medical Patent Ductus Arteriosus Treatment Success in Preterm Infants? *American J. Perinatol.* **2019**, *36*(14), 1504-1509. <https://doi.org/10.1055/s-0039-1678555>.
76. Kazanci, E.G.; Buyuktiryaki, M.; Unsal, H.; Tayman, C. Useful platelet indices for the diagnosis and follow-up of patent ductus arteriosus. *American J. Perinatol.* **2019**, *36*, 1521-1527. <https://doi.org/10.1055/s-0039-1688821>.
77. Kent, A.L.; Wright, I.M.; Abdel-Latif, M.E. Mortality and adverse neurologic outcomes are greater in preterm male infants. *Pediatrics-English Edition* **2012**, *129*, 124. <https://doi.org/10.1542/peds.2011-1578>.
78. Kim, E.S.; Kim, E.-K.; Choi, C.W.; Kim, H.-S.; Kim, B.I.; Choi, J.-H.; Park, J.S.; Moon, K.C. Intrauterine inflammation as a risk factor for persistent ductus arteriosus patency after cyclooxygenase inhibition in extremely low birth weight infants. *J Pediatr.* **2010**, *157*, 745-750. e741. <https://doi.org/10.1016/j.jpeds.2010.05.020>.
79. Kim, J.S.; Shim, E.J. B-type natriuretic Peptide assay for the diagnosis and prognosis of patent ductus arteriosus in preterm infants. *Korean circulation journal* **2012**, *42*, 192-196. <https://doi.org/10.4070/kcj.2012.42.3.192>.
80. Kwinta, P.; Rudzinski, A.; Kruczek, P.; Kordon, Z.; Pietrzyk, J.J. Can early echocardiographic findings predict patent ductus arteriosus? *Neonatology* **2009**, *95*, 141-148. <https://doi.org/10.1159/000153098>
81. Laughon, M.; Bose, C.; Clark, R. Treatment strategies to prevent or close a patent ductus arteriosus in preterm infants and outcomes. *J. Perinatol.* **2007**, *27*, 164. <https://doi.org/10.1038/sj.jp.7211662>.
82. Lauterbach, M.D.; Raz, S.; Sander, C.J. Neonatal hypoxic risk in preterm birth infants: the influence of sex and severity of respiratory distress on cognitive recovery. *Neuropsychology* **2001**, *15*, 411. <https://doi.org/10.1037/0894-4105.15.3.411>.
83. Ledo, A.; Aguar, M.; Núñez-Ramiro, A.; Saénz, P.; Vento, M. Abdominal near-infrared spectroscopy detects low mesenteric perfusion early in preterm infants with hemodynamic significant ductus arteriosus. *Neonatology* **2017**, *112*, 238-245. <https://doi.org/10.1159/000475933>.

84. Leonhardt, A.; Isken, V.; Kühl, P.; Seyberth, H. Prolonged indomethacin treatment in preterm infants with symptomatic patent ductus arteriosus: efficacy, drug level monitoring, and patient selection. *Eur. J. Pediatr.* **1987**, *146*, 140-144. <https://doi.org/10.1007/BF02343219>.
85. Letshwiti, J.B.; Sirc, J.; O'Kelly, R.; Miletin, J. Serial N-terminal pro-brain natriuretic peptide measurement as a predictor of significant patent ductus arteriosus in preterm infants beyond the first week of life. *Eur J. Pediatr.* **2014**, *173*, 1491-1496. <https://doi.org/10.1007/s00431-014-2350-2>
86. Li, D.; Rosito, G.; Slagle, T. Probiotics for the prevention of necrotizing enterocolitis in neonates: an 8-year retrospective cohort study. *J. Clin. Pharm. Ther.* **2013**, *38*, 445-449. <https://doi.org/10.1111/jcpt.12084>.
87. Louis, D.; Wong, C.; Ye, X.Y.; McNamara, P.J.; Jain, A. Factors associated with non-response to second course indomethacin for PDA treatment in preterm neonates. *J. Matern.-Fetal Neonatal Med.* **2018**, *31*, 1407-1411. <https://doi.org/10.1080/14767058.2017.1317736>.
88. Madan, J.; Fiascone, J.; Balasubramanian, V.; Griffith, J.; Hagadorn, J.I. Predictors of ductal closure and intestinal complications in very low birth weight infants treated with indomethacin. *Neonatology* **2008**, *94*, 45-51. <https://doi.org/10.1159/000113058>.
89. Madan, J.C.; Kendrick, D.; Hagadorn, J.I.; Frantz III, I.D.; Health, N.I.O.C.; Network, H.D.N.R. Patent ductus arteriosus therapy: impact on neonatal and 18-month outcome. *Pediatrics* **2009**, *123*, 674. <https://doi.org/10.1542/peds.2007-2781>.
90. Martin, C.G.; Snider, A.R.; Katz, S.M.; Peabody, J.L.; Brady, J.P. Abnormal cerebral blood flow patterns in preterm infants with a large patent ductus arteriosus. *J. Pediatr.* **1982**, *101*, 587-593. [https://doi.org/10.1016/S0022-3476\(82\)80715-4](https://doi.org/10.1016/S0022-3476(82)80715-4).
91. Meinard, L.; Hillman, M.; Rizzotti, A.; Basquiera, A.L.; Tabares, A.; Cuestas, E. C-reactive protein, platelets, and patent ductus arteriosus. *Platelets* **2016**, *27*, 821-823. <https://doi.org/10.1080/09537104.2016.1203398>
92. Mellander, M.; Leheup, B.; Lindstrom, D.P.; Palme, C.; Graham Jr, T.P.; Stahlman, M.T.; Cotton, R.B. Recurrence of symptomatic patent ductus arteriosus in extremely premature infants, treated with indomethacin. *J Pediatr.* **1984**, *105*, 138-143. [https://doi.org/10.1016/S0022-3476\(84\)80380-7](https://doi.org/10.1016/S0022-3476(84)80380-7).
93. Mine, K.; Ohashi, A.; Tsuji, S.; Nakashima, J.; Hirabayashi, M.; Kaneko, K. B-type natriuretic peptide for assessment of haemodynamically significant patent ductus arteriosus in premature infants. *Acta Paediatr* **2013**, *102*, e347-352. <https://doi.org/10.1111/apa.12273>
94. Natarajan, G.; Shankaran, S.; McDonald, S.A.; Das, A.; Ehrenkranz, R.A.; Goldberg, R.N.; Stoll, B.J.; Tyson, J.E.; Higgins, R.D.; Schendel, D. Association Between Blood Spot Transforming Growth Factor- $\beta$  and Patent Ductus Arteriosus in Extremely Low-Birth Weight Infants. *Pediatr. Cardiol.* **2013**, *34*, 149-154. <https://doi.org/10.1007/s00246-012-0404-7>.
95. Nemerofsky, S.L.; Parravicini, E.; Bateman, D.; Kleinman, C.; Polin, R.A.; Lorenz, J.M. The ductus arteriosus rarely requires treatment in infants > 1000 grams. *American J. Perinatol.* **2008**, *25*, 661-666. <https://doi.org/10.1055/s-0028-1090594>.
96. Neubauer, V.; Griesmaier, E.; Ralser, E.; Kiechl-Kohlendorfer, U. The effect of sex on outcome of preterm infants—a population-based survey. *Acta Paediatr.* **2012**, *101*, 906-911. <https://doi.org/10.1111/j.1651-2227.2012.02709.x>.
97. Nizarali, Z.; Marques, T.; Costa, C.; Barroso, R.; Cunha, M. Patent Ductus Arteriosus: Perinatal Risk Factors. *J. pediatr. neonatal biol.* **2012**. <https://doi.org/10.4172/2167-0897.1000109>.
98. Nuntnarumit, P.; Khositseth, A.; Thanomsingh, P. N-terminal probrain natriuretic peptide and patent ductus arteriosus in preterm infants. *J. Perinatol.* **2009**, *29*, 137. <https://doi.org/10.1038/jp.2008.185>.
99. Oh, S.H.; Lee, B.S.; Jung, E.; Oh, M.Y.; Do, H.-J.; Kim, E.A.-R.; Kim, K.-S. Plasma B-type natriuretic peptide cannot predict treatment response to ibuprofen in preterm infants with patent ductus arteriosus. *Sci. Rep.* **2020**, *10*, 1-7. <https://doi.org/10.1038/s41598-020-61291-w>.

100. Okur, N.; Tayman, C.; Büyüktiryaki, M.; Kadioğlu Şimşek, G.; Ozer Bekmez, B.; Altuğ, N. Can lactate levels be used as a marker of patent ductus arteriosus in preterm babies? *J. Clin. Lab. Anal.* **2019**, *33*, e22664. <https://doi.org/10.1002/jcla.22664>.
101. Oliveira, A.; Soares, P.; Flor-de-Lima, F.; Neves, A.L.s.; Guimarães, H.I. PDA management in VLBW infants: experience of a level III NICU. *J. Pediatr. Neonatal Individ. Med.* **2016**, *5*, e050227.
102. Olsson, K.W.; Jonzon, A.; Sindelar, R. Early haemodynamically significant patent ductus arteriosus does not predict future persistence in extremely preterm infants. *Acta Paediatr.* **2019**. <https://doi.org/10.1111/apa.14752>.
103. Olsson, K.W.; Larsson, A.; Jonzon, A.; Sindelar, R. Exploration of potential biochemical markers for persistence of patent ductus arteriosus in preterm infants at 22–27 weeks' gestation. *Pediatr. Res.* **2018**, *1*. <https://doi.org/10.1038/s41390-018-0182-x>.
104. Olukman, O.; Ozdemir, R.; Karadeniz, C.; Calkavur, S.; Mese, T.; Vergin, C. Is there a relationship between platelet parameters and patency of ductus arteriosus in preterm infants? *Blood Coagul. Fibrinolysis* **2017**, *28*, 8-13. <https://doi.org/10.1097/MBC.0000000000000520>.
105. O'Rourke, D.J.; El-Khuffash, A.; Moody, C.; Walsh, K.; Molloy, E.J. Patent ductus arteriosus evaluation by serial echocardiography in preterm infants. *Acta Paediatr* **2008**, *97*, 574-578. <https://doi.org/10.1111/j.1651-2227.2008.00745.x>
106. Patole, S.K.; Kumaran, V.; Travadi, J.N.; Brooks, J.M.; Doherty, D.A. Does patent ductus arteriosus affect feed tolerance in preterm neonates? *Arch Dis Child Fetal Neonatal Ed* **2007**, *92*, F53-55. <https://doi.org/10.1136/adc.2006.093708>.
107. Peacock, J.L.; Marston, L.; Marlow, N.; Calvert, S.A.; Greenough, A. Neonatal and infant outcome in boys and girls born very prematurely. *Pediatr. Res.* **2012**, *71*, 305. <https://doi.org/10.1038/pr.2011.50>.
108. Pees, C.; Walch, E.; Obladen, M.; Koehne, P. Echocardiography predicts closure of patent ductus arteriosus in response to ibuprofen in infants less than 28 week gestational age. *Early Hum Dev* **2010**, *86*, 503-508. <https://doi.org/10.1016/j.earlhumdev.2010.06.012>.
109. Pereira, S.S.; Kempley, S.T.; Shah, D.K.; Morris, J.K.; Sinha, A.K. Early echocardiography does not predict subsequent treatment of symptomatic patent ductus arteriosus in extremely preterm infants. *Acta Paediatr.* **2018**, *107*, 1909-1916. <https://doi.org/10.1111/apa.14361>.
110. Polat, T.B.; Celik, I.H.; Erdeve, O. Early predictive echocardiographic features of hemodynamically significant patent ductus arteriosus in preterm VLBW infants. *Pediatr. Int.* **2016**, *58*, 589-594. <https://doi.org/10.1111/ped.12915>.
111. Pourarian, S.; Farahbakhsh, N.; Sharma, D.; Cheriki, S.; Bijanzadeh, F. Prevalence and risk factors associated with the patency of ductus arteriosus in premature neonates: a prospective observational study from Iran. *J. Matern.-Fetal Neonatal Med.* **2017**, *30*, 1460-1464. <https://doi.org/10.1080/14767058.2016.1219991>.
112. Reller, M.D.; Lorenz, J.M.; Kotagal, U.R.; Meyer, R.A.; Kaplan, S. Hemodynamically significant PDA: an echocardiographic and clinical assessment of incidence, natural history, and outcome in very low birth weight infants maintained in negative fluid balance. *Pediatr. Cardiol* **1985**, *6*, 17-23. <https://doi.org/10.1007/BF02265403>.
113. Rodriguez-Blanco, S.; Oulego-Eroz, I.; Gautreaux-Minaya, S.; Perez-Muñizuri, A.; Couce-Pico, M.L. Early NT-proBNP levels as a screening tool for the detection of hemodynamically significant patent ductus arteriosus during the first week of life in very low birth weight infants. *J. Perinatol.* **2018**, *38*, 881. <https://doi.org/10.1038/s41372-018-0123-x>.
114. Romagnoli, V.; Pedini, A.; Santoni, M.; Scutti, G.; Colaneri, M.; Pozzi, M.; Cogo, P.E.; Carnielli, V.P. Patent ductus arteriosus in preterm infants born before 30 weeks' gestation: high rate of spontaneous closure after hospital discharge. *Cardiol. Young* **2018**, *28*, 995-1000. <https://doi.org/10.1017/S1047951118000641>.
115. Rooney, S.R.; Shelton, E.L.; Aka, I.; Shaffer, C.M.; Clyman, R.I.; Dagle, J.M.; Ryckman, K.; Lewis, T.R.; Reese, J.; Van Driest, S.L. CYP2C9\* 2 is associated with indomethacin treatment failure for patent ductus arteriosus. *Pharmacogenomics* **2019**, *20*, 939-946. <https://doi.org/10.2217/pgs-2019-0079>.

116. Sadeck, L.S.; Leone, C.R.; Procianoy, R.S.; Guinsburg, R.; Marba, S.; Martinez, F.E.; Rugolo, L.M.; Moreira, M.E.L.; Fiori, R.M.; Ferrari, L.L. Effects of therapeutic approach on the neonatal evolution of very low birth weight infants with patent ductus arteriosus. *J. Pediatr* **2014**, *90*, 616-623. <https://doi.org/10.1016/j.jpeds.2014.04.010>.
117. Sallmon, H.; Weber, S.C.; Dirks, J.; Schiffer, T.; Klippstein, T.; Stein, A.; Felderhoff-Müser, U.; Metze, B.; Hansmann, G.; Bühner, C. Association between platelet counts before and during pharmacological therapy for patent ductus arteriosus and treatment failure in preterm infants. *Front. Pediatr.* **2018**, *6*, 41. <https://doi.org/10.3389/fped.2018.00041>.
118. Sallmon, H.; Weber, S.C.; Huning, B.; Stein, A.; Horn, P.A.; Metze, B.C.; Dame, C.; Buhner, C.; Felderhoff-Muser, U.; Hansmann, G.; et al. Thrombocytopenia in the first 24 hours after birth and incidence of patent ductus arteriosus. *Pediatrics* **2012**, *130*, e623-630. <https://doi.org/10.1542/peds.2012-0499>.
119. Sanjeev, S.; Pettersen, M.; Lua, J.; Thomas, R.; Shankaran, S.; L'Ecuyer, T. Role of plasma B-type natriuretic peptide in screening for hemodynamically significant patent ductus arteriosus in preterm neonates. *J. Perinatol.* **2005**, *25*, 709-713. <https://doi.org/10.1038/sj.jp.7211383>.
120. Schwarz, C.E.; Preusche, A.; Wolf, M.; Poets, C.F.; Franz, A.R. Prospective observational study on assessing the hemodynamic relevance of patent ductus arteriosus with frequency domain near-infrared spectroscopy. *BMC Pediatr.* **2018**, *18*, 66. <https://doi.org/10.1186/s12887-018-1054-6>.
121. Sellmer, A.; Bjerre, J.V.; Schmidt, M.R.; McNamara, P.J.; Hjortdal, V.E.; Høst, B.; Bech, B.H.; Henriksen, T.B. Morbidity and mortality in preterm neonates with patent ductus arteriosus on day 3. *Arch. Dis. Child. Fetal Neonatal Ed.* **2013**, *98*, F505-F510. <https://doi.org/10.1136/archdischild-2013-303816>.
122. Semberova, J.; Sirc, J.; Miletin, J.; Kucera, J.; Berka, I.; Sebkova, S.; O'Sullivan, S.; Franklin, O.; Stranak, Z. Spontaneous closure of patent ductus arteriosus in infants ≤ 1500 g. *Pediatrics* **2017**, *140*, e20164258. <https://doi.org/10.1542/peds.2016-4258>.
123. Seon, H.-S.; Lee, J.-B.; Kim, I.-U.; Kim, S.-H.; Lee, J.-H.; Kim, D.-H.; Kim, H.-S. Association with ductus arteriosus closure by ibuprofen and intrauterine inflammation in very low birth weight infants. *Korean J. Perinatol.* **2013**, *24*, 158-167. <https://doi.org/10.14734/kjp.2013.24.3.158>.
124. Shah, N.A.; Hills, N.K.; Waleh, N.; McCurnin, D.; Seidner, S.; Chemtob, S.; Clyman, R. Relationship between circulating platelet counts and ductus arteriosus patency after indomethacin treatment. *J. Pediatr.* **2011**, *158*, 919-923 e911-912. <https://doi.org/10.1016/j.jpeds.2010.11.018>.
125. Skiöld, B.; Alexandrou, G.; Padilla, N.; Blennow, M.; Vollmer, B.; Ådén, U. Sex differences in outcome and associations with neonatal brain morphology in extremely preterm children. *J. Pediatr.* **2014**, *164*, 1012-1018. <https://doi.org/10.1016/j.jpeds.2013.12.051>.
126. Stark, M.J.; Hodyl, N.A.; Wright, I.M.; Clifton, V. The influence of sex and antenatal betamethasone exposure on vasoconstrictors and the preterm microvasculature. *J. Matern.-Fetal Neonatal Med.* **2011**, *24*, 1215-1220. <https://doi.org/10.3109/14767058.2011.569618>.
127. Steiner, M.; Salzer-Muhar, U.; Swoboda, V.; Unterasinger, L.; Baumgartner, S.; Waldhoer, T.; Langgartner, M.; Klebermass-Schrehof, K.; Berger, A. Preterm infants who later require duct ligation show different vital signs and pH in early postnatal life. *Acta Paediatr.* **2015**, *104*, e7-e13. <https://doi.org/10.1111/apa.12814>.
128. Stevenson, D.K.; Verter, J.; Fanaroff, A.A.; Oh, W.; Ehrenkranz, R.A.; Shankaran, S.; Donovan, E.F.; Wright, L.L.; Lemons, J.A.; Tyson, J.E. Sex differences in outcomes of very low birthweight infants: the newborn male disadvantage. *Arch. Dis. Child. Fetal Neonatal Ed.* **2000**, *83*, F182-F185. <https://doi.org/10.1136/fn.83.3.F182>.
129. Strauss, T.; Pessach, I.; Jacoby, E.; Schushan-Eisen, I.; Mazkereth, R.; Kuint, J. Carina angle measurements for diagnosis of patent ductus arteriosus in preterm infants. *Neonatology* **2011**, *99*, 224-230. <https://doi.org/10.1159/000315862>.
130. Tauber, K.; Granina, E.; Doyle, R.; Munshi, U. Gestational and postnatal age influence B-type natriuretic peptide level used in diagnosis of a hemodynamically significant patent ductus arteriosus in preterm infants. *J. Clin. Neonatol.* **2016**, *5*, 143-149. <https://doi.org/10.4103/2249-4847.191241>.
131. Terek, D.; Yalaz, M.; Ulger, Z.; Koroglu, O.A.; Kultursay, N. Medical closure of patent ductus arteriosus does not reduce mortality and development of bronchopulmonary dysplasia in preterm infants. *J. Res. Med. Sci.* **2014**, *19*, 1074. <https://doi.org/10.1038/nm0913-1074>.



132. Tioseco, J.A.; Aly, H.; Essers, J.; Patel, K.; El-Mohandes, A.A. Male sex and intraventricular hemorrhage. *Pediatr. Crit. Care Med.* **2006**, *7*, 40-44. <https://doi.org/10.1097/01.PCC.0000192341.67078.61>.
133. Uchiyama, A.; Nagasawa, H.; Yamamoto, Y.; Tatebayashi, K.; Suzuki, H.; Yamada, K.; Arai, M.; Kohno, Y. Clinical aspects of very-low-birthweight infants showing reopening of ductus arteriosus. *Pediatr. Int.* **2011**, *53*, 322-327. <https://doi.org/10.1111/j.1442-200X.2010.03251.x>.
134. Vaidya, R.; Knee, A.; Paris, Y.; Singh, R. Predictors of successful patent ductus arteriosus closure with acetaminophen in preterm infants. *J. Perinatol.* **2021**, *41*, 998-1006. <https://doi.org/10.1038/s41372-020-00803-y>.
135. Van de Bor, M.; Verloove-Vanhorick, S.P.; Brand, R.; Ruys, J.H. Patent ductus arteriosus in a cohort of 1338 preterm infants: a collaborative study. *Paediatr. Perinat. Epidemiol.* **1988**, *2*, 328-336. <https://doi.org/10.1111/j.1365-3016.1988.tb00227.x>.
136. Velazquez, D.M.; Reidy, K.J.; Sharma, M.; Kim, M.; Vega, M.; Havranek, T. The effect of hemodynamically significant patent ductus arteriosus on acute kidney injury and systemic hypertension in extremely low gestational age newborns. *J. Matern.-Fetal Neonatal Med.* **2018**, 1-6. <https://doi.org/10.1080/14767058.2018.1460349>.
137. Vieux, R.; Desandes, R.; Boubred, F.; Semama, D.; Guillemin, F.; Buchweiller, M.-C.; Fresson, J.; Hascoet, J.-M. Ibuprofen in very preterm infants impairs renal function for the first month of life. *Pediatr. Nephrol.* **2010**, *25*, 267-274. <https://doi.org/10.1007/s00467-009-1349-9>.
138. Visconti, L.F.; Morhy, S.S.; Deutsch, A.D.; Tavares, G.M.; Wilberg, T.J.; Rossi Fde, S. Clinical and echocardiographic characteristics associated with the evolution of the ductus arteriosus in the neonate with birth weight lower than 1,500g. *Einstein (Sao Paulo)* **2013**, *11*, 317-323. <https://doi.org/10.1590/S1679-45082013000300010>.
139. Weiss, H.; Cooper, B.; Brook, M.; Schlueter, M.; Clyman, R. Factors determining reopening of the ductus arteriosus after successful clinical closure with indomethacin. *J. Pediatr.* **1995**, *127*, 466-471. [https://doi.org/10.1016/S0022-3476\(95\)70084-6](https://doi.org/10.1016/S0022-3476(95)70084-6).
140. Weisz, D.E.; Mirea, L.; Rosenberg, E.; Jang, M.; Ly, L.; Church, P.T.; Kelly, E.; Kim, S.J.; Jain, A.; McNamara, P.J. Association of patent ductus arteriosus ligation with death or neurodevelopmental impairment among extremely preterm infants. *JAMA Pediatr.* **2017**, *171*, 443-449. <https://doi.org/10.1001/jamapediatrics.2016.5143>.
141. Yang, C.-Z.; Lee, J. Factors affecting successful closure of hemodynamically significant patent ductus arteriosus with indomethacin in extremely low birth weight infants. *World J. Clin. Pediatr.* **2008**, *4*, 91-96. <https://doi.org/10.1007/s12519-008-0017-7>.
142. Yoon, M.J.; Yoon, H.S.; Chung, S.H.; Han, M.Y.; Bae, C.W. The factors associated with the efficacy of indomethacin treatment in premature infants with patent ductus arteriosus. *Korean J. Pediatr.* **2007**, *50*, 531-535. <https://doi.org/10.3345/kjp.2007.50.6.531>.
143. Yum, S.K.; Moon, C.-J.; Youn, Y.-A.; Lee, J.Y.; Sung, I.K. Echocardiographic assessment of patent ductus arteriosus in very low birthweight infants over time: prospective observational study. *J. Matern.-Fetal Neonatal Med.* **2018**, *31*, 164-172. <https://doi.org/10.1080/14767058.2016.1278207>.
144. Zanardo, V.; Vedovato, S.; Chiozza, L.; Faggian, D.; Favaro, F.; Trevisanuto, D. Pharmacological closure of patent ductus arteriosus: effects on pulse pressure and on endothelin-1 and vasopressin excretion. *American J. Perinatol.* **2008**, *25*, 353-358. <https://doi.org/10.1055/s-2008-1078763>.
145. Zisk, J.L.; Genen, L.H.; Kirkby, S.; Webb, D.; Greenspan, J.; Dysart, K. Do premature female infants really do better than their male counterparts? *American J. Perinatol.* **2011**, *28*, 241-246. <https://doi.org/10.1055/s-0030-1268239>.
146. Zozaya, C.; Avila-Alvarez, A.; Arruza, L.; Rodrigo, F.G.-M.; Fernandez-Perez, C.; Castro, A.; Cuesta, M.T.; Vacas, B.; Couce, M.L.; Torres, M.V. The effect of morbidity and sex on postnatal growth of very preterm infants: a multicenter cohort study. *Neonatology* **2019**, *115*, 348-354. <https://doi.org/10.1159/000497221>.

**Table S3.** Meta-regression of continuous covariates.

| Meta-analysis                           | Covariate               | K  | Coefficient | 95% CI      |             | P     | R <sup>2</sup> analog |
|-----------------------------------------|-------------------------|----|-------------|-------------|-------------|-------|-----------------------|
|                                         |                         |    |             | Lower limit | Upper limit |       |                       |
| <b>Any PDA vs. closed DA</b>            | GA total cohort (weeks) | 80 | 0.002       | -0.012      | 0.020       | 0.871 | 0.00                  |
|                                         | Median year of cohort   | 72 | -0.002      | -0.006      | 0.002       | 0.332 | 0.00                  |
| <b>hsPDA vs.(small PDA + closed DA)</b> | GA total cohort (weeks) | 36 | 0.014       | -0.020      | 0.049       | 0.408 | 0.00                  |
|                                         | Median year of cohort   | 34 | 0.000       | -0.010      | 0.010       | 0.998 | 0.00                  |
| <b>hsPDA vs small PDA</b>               | GA total cohort (weeks) | 28 | -0.009      | -0.062      | 0.043       | 0.723 | 0.00                  |
|                                         | Median year of cohort   | 23 | 0.009       | 0.001       | 0.0160      | 0.884 | 0.00                  |
| <b>Responders vs non responders</b>     | GA total cohort (weeks) | 45 | -0.016      | -0.039      | 0.007       | 0.169 | 0.00                  |
|                                         | Median year of cohort   | 41 | 0.003       | -0.005      | 0.005       | 0.965 | 0.00                  |

GA: gestational age; hs: hemodynamically significant; PDA: patent ductus arteriosus

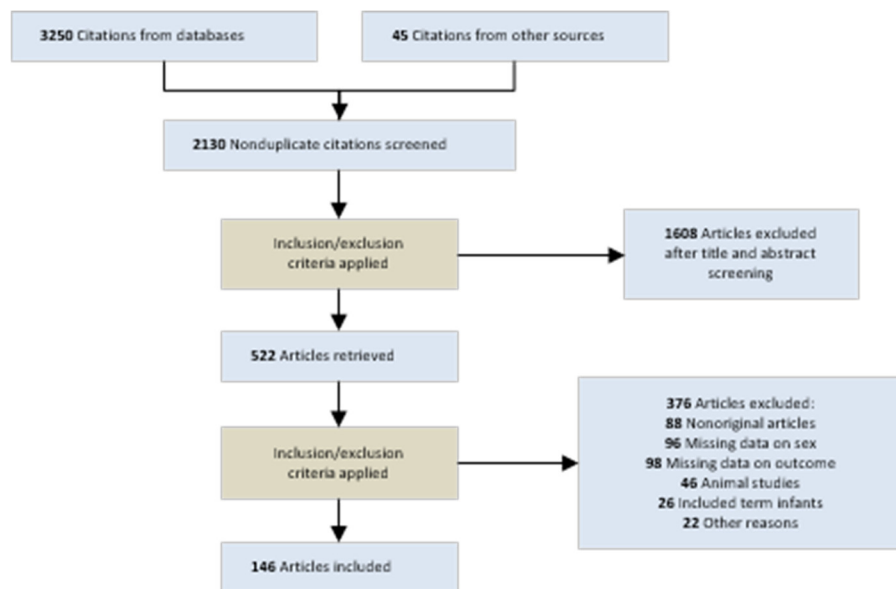

**Figure S1.** Flow diagram of the systematic search.

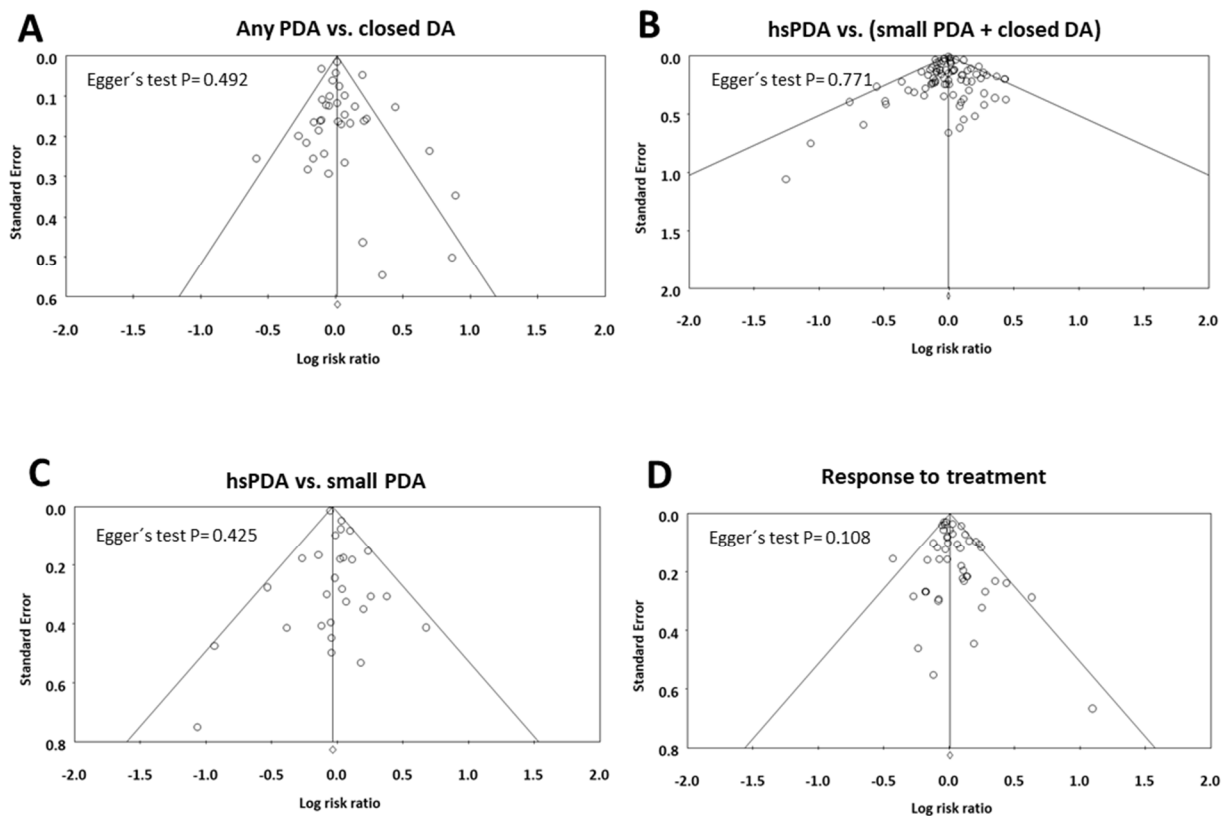

**Figure S2.** Funnel plot for publication bias analysis for the studies included in the different meta-analyses.

hs: hemodynamically significant. PDA: patent ductus arteriosus
